# Supplementary material for: A first-principles study of electro-catalytic reduction of CO2 on transition metal-doped stanene
Source: Royal Society of Chemistry journal article supplement (doi:10.1039/d3cp04841a), 2024-01-01
Supplement: d3cp04841a1.pdf [file d3cp04841a1.pdf]

## Supporting Information

### A first-principles study of electro-catalytic reduction of CO<sub>2</sub> on Transition Metal Doped Stanene

Sudatta Giri<sup>1</sup>, Satyesh K Yadav<sup>2</sup>, Debolina Misra<sup>1,\*</sup>

<sup>1</sup>Materials Modelling and Simulation Laboratory, Department of Physics, Indian Institute of Information Technology, Design and Manufacturing, Kancheepuram, Chennai, India, 600127.

<sup>2</sup>Department of Metallurgical and Materials Engineering, Indian Institute of Technology Madras, India, 600036.

Corresponding author: [debolinam@iiitdm.ac.in](mailto:debolinam@iiitdm.ac.in)

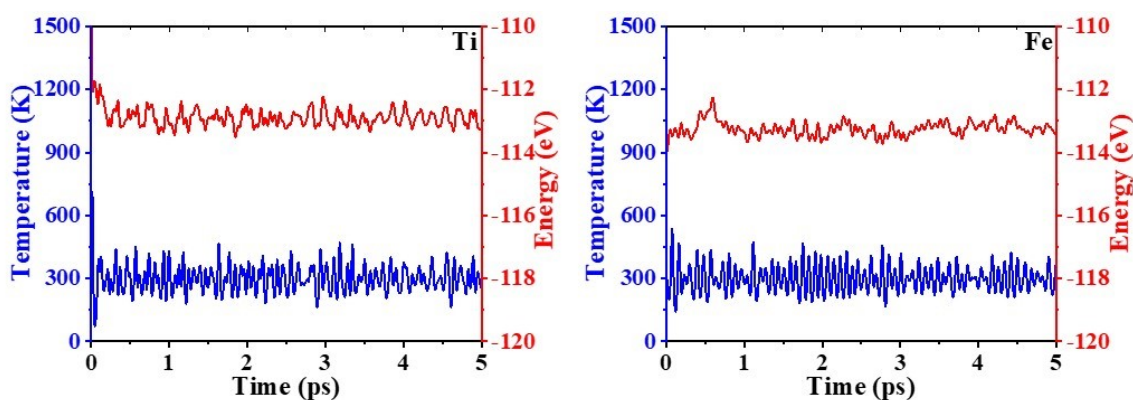

**Figure S1:** Energy and temperature variation for Ti- and Fe- doped stanene at 300 K for 5 ps.

| Adsorbate        | ZPE (eV) | -TS (eV) | G – E <sub>elec</sub> (eV) |
|------------------|----------|----------|----------------------------|
| *CO <sub>2</sub> | 0.330    | -0.255   | 0.075                      |
| *COOH            | 0.619    | -0.098   | 0.521                      |
| *CO              | 0.219    | -0.131   | 0.088                      |
| *OCHO            | 0.592    | -0.158   | 0.434                      |
| *HCOOH           | 0.940    | -0.150   | 0.790                      |

**Table S1:** Contributions of zero-point energy and entropic corrections<sup>1,2</sup> to adsorbate free energies

**Electro-chemical stability:**

Energy of formation of pure and TM-doped stanene are calculated as<sup>3</sup>  
 $\Delta E = E(\text{Sn}_x\text{M}_y) - xE_{\text{Sn}} - yE_{\text{M}}$

Here M denotes the TM SA,  $x$  and  $y$  are the numbers of Sn and TM atoms respectively.  $\Delta E$  for pure stanene is calculated to be  $-0.258 \text{ eV}/\text{\AA}^2$ . For TM@Sn,  $\Delta E$  values are listed in Table S2.

The dissolution potential for TM@Sn is calculated as<sup>4</sup>,

$$U_{\text{Diss}} = U_{\text{Diss}}^0 - \frac{E_{\text{TM-Sn}} - E_{\text{Sn}} - \mu_m}{ne}$$

Where  $U_{\text{Diss}}^0$ ,  $n$  and  $e$  are standard dissolution potential of metal, number of electron involved in dissolution and electronic charge respectively and the corresponding values of  $U_{\text{Diss}}^0$  and  $n$  are taken from existing literature<sup>4</sup>.  $E_{\text{TM-Sn}}$  and  $E_{\text{Sn}}$  are the energies of stanene layer with and without TM atom,  $\mu_m$  is the chemical potential of the TM SA with gaseous energy reference representing implantation of TM SA as reported previously in similar hosts<sup>5-11</sup>.

The dissolution potentials for TM@Sn (TM: Ti, Fe) are listed below in Table S2.

| TM | $\Delta E$ (eV/ $\text{\AA}^2$ ) | $U_{\text{Diss}}^0$ (V) | $n$ | $\mu_m$ (eV) | $U_{\text{Diss}}^G$ (V) |
|----|----------------------------------|-------------------------|-----|--------------|-------------------------|
| Ti | -0.271                           | -1.63                   | 2   | -2.332       | 0.53                    |
| Fe | -0.268                           | -0.45                   | 2   | -3.236       | 1.12                    |

**Table S2:** Energy of formation/area and Dissolution potentials for TM@Sn.

With crystalline energy reference for the TM SAs, the energy of formation for Ti@Sn and Fe@Sn are 1.08 eV and 1.75 eV respectively. Both these values are significantly lower than the formation energies reported for similar 2D materials such as free-standing or graphene with single and double vacancies<sup>12,13</sup>, within the same level of theory. The values however will change if improved DFT functional such as DFT+U<sup>4</sup> or hybrid functional<sup>3</sup> HSE06 is adopted.

### Hydrogen Bond Strength:

The possibility of H-bond formation between the activated CO<sub>2</sub> and the nearby H<sub>2</sub>O molecules is realized through the interaction energies ( $E_{in}$ ) between these two molecules, calculated as per the super-molecular approach<sup>12</sup>,

$$E_{in} = E_{AB} - E_A - E_B$$

Where  $E_A$ ,  $E_B$ , and  $E_{AB}$  are the energies of the optimized CO<sub>2</sub>, H<sub>2</sub>O molecules and of the complex formed due to their co-adsorption respectively<sup>14</sup>. Our calculated  $E_{in}$  values are -0.08 eV and -0.07 eV for Ti and Fe-doped stanene respectively, indicating that formation of H-bond is favourable.

For Ti@Sn and Fe@Sn, the distances between (i) oxygen atoms of H<sub>2</sub>O and CO<sub>2</sub> are 2.837 Å and 2.905 Å, and (ii) oxygen atom of H<sub>2</sub>O and carbon atom of CO<sub>2</sub> are 4.06 Å and 4 Å respectively, both shorter than 4.19 Å, the sum of Van der Waals radii of Carbon (1.7 Å), Oxygen (1.52 Å) and O-H bond length in H<sub>2</sub>O (0.97 Å).

The Bader charges on the oxygen atom of H<sub>2</sub>O (charge accumulation) and carbon atom of CO<sub>2</sub> (charge depletion) for both the catalysts are listed below in Table S3.

| Catalysts | Bader charge $q$ ( $e$ ) |              |
|-----------|--------------------------|--------------|
|           | $q_C^{CO_2}$             | $q_O^{H_2O}$ |
| Ti@Sn     | +1.15                    | -1.27        |
| Fe@Sn     | +1.47                    | -1.37        |

**Table S3:** Bader charge analysis for C atom in CO<sub>2</sub> and O atom in H<sub>2</sub>O.

### References:

1 S. Zhou, W. Pei, J. Zhao and A. Du, Silicene catalysts for CO<sub>2</sub> hydrogenation: the number of layers controls selectivity, *Nanoscale*, 2019, **11**, 7734–7743.

- 2Y. Yang, J. Li, C. Zhang, Z. Yang, P. Sun, S. Liu and Q. Cao, Theoretical Insights into Nitrogen-Doped Graphene-Supported Fe, Co, and Ni as Single-Atom Catalysts for CO<sub>2</sub> Reduction Reaction, *J. Phys. Chem. C*, 2022, **126**, 4338–4346.
- 3X. Li, H. Li, X. Zuo, L. Kang, D. Li, B. Cui and D. Liu, Chemically Functionalized Penta-stanene Monolayers for Light Harvesting with High Carrier Mobility, *J. Phys. Chem. C*, 2018, **122**, 21763–21769.
- 4L. Gong, X. Wang, T. Zheng, J. Liu, J. Wang, Y.-C. Yang, J. Zhang, X. Han, L. Zhang and Z. Xia, Catalytic mechanism and design principle of coordinately unsaturated single metal atom-doped covalent triazine frameworks with high activity and selectivity for CO<sub>2</sub> electroreduction, *J. Mater. Chem. A*, 2021, **9**, 3555–3566.
- 5P.-C. Lin, R. Villarreal, S. Achilli, H. Bana, M. N. Nair, A. Tejada, K. Verguts, S. De Gendt, M. Auge, H. Hofsäss, S. De Feyter, G. Di Santo, L. Petaccia, S. Brems, G. Fratesi and L. M. C. Pereira, Doping Graphene with Substitutional Mn, *ACS Nano*, 2021, **15**, 5449–5458.
- 6Y. Dong, Y. Deng, J. Zeng, H. Song and S. Liao, A high-performance composite ORR catalyst based on the synergy between binary transition metal nitride and nitrogen-doped reduced graphene oxide, *J. Mater. Chem. A*, 2017, **5**, 5829–5837.
- 7L. Yan, H. Jiang, Y. Xing, Y. Wang, D. Liu, X. Gu, P. Dai, L. Li and X. Zhao, Nickel metal–organic framework implanted on graphene and incubated to be ultrasmall nickel phosphide nanocrystals acts as a highly efficient water splitting electrocatalyst, *J. Mater. Chem. A*, 2018, **6**, 1682–1691.
- 8F. Ren, M. Yao, M. Li and H. Wang, Tailoring the Structural and Electronic Properties of Graphene through Ion Implantation, *Materials*, 2021, **14**, 5080.
- 9L. Baraton, Z. He, C. S. Lee, J.-L. Maurice, C. S. Cojocaru, A.-F. Gourgues-Lorenzon, Y. H. Lee and D. Pribat, Synthesis of few-layered graphene by ion implantation of carbon in nickel thin films, *Nanotechnology*, 2011, **22**, 085601.
- 10 D. Misra and S. K. Yadav, Prediction of Site Preference of Implanted Transition Metal Dopants in Rock-salt Oxides, *Sci Rep*, 2019, **9**, 12593.
- 11 D. Misra and S. K. Yadav, Nb-Implanted BaO as a Support for Gold Single Atoms, *J. Phys. Chem. C*, 2021, **125**, 28059–28066.

- 12 L. Wang, X. Zhang, H. L. W. Chan, F. Yan and F. Ding, Formation and Healing of Vacancies in Graphene Chemical Vapor Deposition (CVD) Growth, *J. Am. Chem. Soc.*, 2013, **135**, 4476–4482.
- 13 A. A. El-Barbary, R. H. Telling, C. P. Ewels, M. I. Heggie and P. R. Briddon, Structure and energetics of the vacancy in graphite, *Phys. Rev. B*, 2003, **68**, 144107.
- 14 L. Bondesson, K. V. Mikkelsen, Y. Luo, P. Garberg and H. Ågren, Density functional theory calculations of hydrogen bonding energies of drug molecules, *Journal of Molecular Structure: THEOCHEM*, 2006, **776**, 61–68.
